# Supplementary material for: Native mass spectrometry combined with enzymatic dissection unravels glycoform heterogeneity of biopharmaceuticals
Source: PubMed Central journal article supplement (PMC5928108; doi:10.1038/s41467-018-04061-7), 2018-04-30
Supplement: 41467_2018_4061_MOESM3_ESM.pdf [file 41467_2018_4061_MOESM3_ESM.pdf]

## **Descriptions of Additional Supplementary Files**

File Name: Supplementary Data 1

Description: ZIP archive containing raw spectra (in RAW and mzML format); MoFi parameter and output files; processed results and the corresponding processing scripts; glycopeptide data. See the readme file for further details.
